# Supplementary material for: Exploring Diverse Modeling Schemes for Runoff Prediction: An Application to 544 Basins in China
Source: Copernicus journal article supplement (doi:10.5194/egusphere-2025-1161), 2025-06-02

*Supporting Information for*

**Exploring Diverse Modeling Schemes for Runoff Prediction: An  
Application to 544 Basins in China**

**Yuqian Hu<sup>a</sup>, Heng Li<sup>a</sup>, Chunxiao Zhang<sup>a,b,\*</sup>, Dingtao Shen<sup>c,d</sup>, Bingli Xu<sup>e</sup>, Min Chen<sup>f,g,h</sup>,  
Wenhao Chu<sup>a</sup>, Rongrong Li<sup>i</sup>**

<sup>a</sup> *School of Information Engineering, China University of Geosciences in Beijing, Beijing, China.*

<sup>b</sup> *Observation and Research Station of Beijing Fangshan Comprehensive Exploration, Ministry of  
Natural Resources, Beijing, China.*

<sup>c</sup> *Key Laboratory for Geographical Process Analysis & Simulation of Hubei Province, Central China  
Normal University, 430079, Wuhan, China.*

<sup>d</sup> *College of Urban and Environmental Sciences, Central China Normal University, 430079, Wuhan,  
China.*

<sup>e</sup> *Department of Information and Communication, Academy of Army Armored Forces, Beijing, China.*

<sup>f</sup> *Key Laboratory of Virtual Geographic Environment (Ministry of Education of PRC), Nanjing Normal  
University, Nanjing, Jiangsu, China.*

<sup>g</sup> *International Research Center of Big Data for Sustainable Development Goals, Beijing, China.*

<sup>h</sup> *Jiangsu Center for Collaborative Innovation in Geographical Information Resource Development  
and Application, Nanjing, Jiangsu, China*

<sup>i</sup> *Institute of Space and Earth Information Science, The Chinese University of Hong Kong, Shatin, New  
Territories, Hong Kong, China.*

Submitted to *Hydrology and Earth System Sciences*

\*Corresponding author: C. Zhang

*School of Information Engineering, China University of Geosciences in Beijing, No. 29,  
Xueyuan Road, Haidian District, Beijing 100083, China*

*Email: zcx@cugb.edu.cn*

## Contents

|                                                                                               |   |
|-----------------------------------------------------------------------------------------------|---|
| <b>Table S1</b> Basin distribution information of China's nine river systems.....             | 1 |
| <b>Table S2</b> Basin distribution information of China's seven climate regions .....         | 1 |
| <b>Table S3</b> EXP-HYDRO model hydrological parameters meaning and value range table.....    | 2 |
| <b>Table S4</b> Xin'an jiang model hydrological parameters meaning and value range table..... | 2 |
| <b>Table S5</b> The details for all the hybrid models .....                                   | 3 |
| <b>Table S6</b> The data sources of indexes in Figure 13. ....                                | 3 |
| <b>Figure. S1.</b> Spatial distribution of outlets in 544 basins.....                         | 3 |
| <b>Figure. S2.</b> The time series of runoff over 15 gauged basins. ....                      | 4 |

**Table S1 Basin distribution information of China's nine river systems.**

| River system_id | River system name              | Basins number |
|-----------------|--------------------------------|---------------|
| 1               | Southeast Basin                | 18            |
| 2               | Haihe River Basin              | 16            |
| 3               | Huaihe River Basin             | 30            |
| 4               | Yellow River Basin             | 72            |
| 5               | Continental Basin              | 52            |
| 6               | Songhua and Liaohe River Basin | 90            |
| 7               | Southwest Basin                | 61            |
| 8               | Yangtze River Basin            | 146           |
| 9               | Pearl River Basin              | 59            |

**Table S2 Basin distribution information of China's seven climate regions.**

| Region_id | Region name                         | Basins number |
|-----------|-------------------------------------|---------------|
| 1         | Mid-temperate arid regions          | 21            |
| 2         | Temperate semi-arid regions         | 30            |
| 3         | Mid-temperate semi-humid regions    | 75            |
| 4         | Warm temperate semi-humid regions   | 75            |
| 5         | Northern subtropical humid regions  | 190           |
| 6         | Plateau temperate semi-arid regions | 112           |
| 7         | Marginal humid tropical regions     | 41            |

**Table S3 EXP-HYDRO model hydrological parameters meaning and value range table.**

| Parameters       | Description                                         | Units            | Lower limit | Upper limit |
|------------------|-----------------------------------------------------|------------------|-------------|-------------|
| f                | the rate of decline in runoff from catchment bucket | mm <sup>-1</sup> | 0.0         | 0.1         |
| S <sub>max</sub> | Maximum storage of the catchment bucket             | mm               | 100.0       | 1500.0      |
| Q <sub>max</sub> | Maximum subsurface runoff at full bucket            | mm/day           | 10.0        | 50.0        |
| D <sub>f</sub>   | Thermal degree-day factor                           | mm/day/°C        | 0.0         | 5.0         |
| T <sub>max</sub> | Temperature above which snow starts melting         | °C               | 0.0         | 3.0         |
| T <sub>min</sub> | Temperature below which precipitation is snow       | °C               | -3.0        | 0.0         |

**Table S4** Xin'anjiang model model hydrological parameters meaning and value range table.

| Parameters | Description                                                   | Units | Lower limit | Upper limit |
|------------|---------------------------------------------------------------|-------|-------------|-------------|
| UM         | areal mean tension water storage in the upper layer           | mm    | 0.1         | 20          |
| LM         | areal mean tension water storage in the lower layer           | mm    | 60          | 90          |
| DM         | areal mean tension water storage in the deep layer            | mm    | 60          | 120         |
| C          | conversion coefficient of deep evapotranspiration             |       | 0.01        | 0.2         |
| B          | exponent of the tension water capacity curve                  |       | 0.1         | 0.4         |
| K1         | outflow coefficients of the free water storage to interflow   | -     | 0.01        | 0.7         |
| K2         | outflow coefficients of the free water storage to groundwater | -     | 0.01        | 0.7         |
| K3         | recession constant of the lower interflow storage             | -     | 0.01        | 0.9         |

**Table S5** The details for all the hybrid models.

| Models      | Model inputs                                            | Training set                                    | Testing set                                     |
|-------------|---------------------------------------------------------|-------------------------------------------------|-------------------------------------------------|
|             | EXP-HYDRO predicted runoff,                             |                                                 |                                                 |
| EXP-IN-LSTM | 5 meteorological forcings,<br>15 static basin attribute |                                                 |                                                 |
|             | Xin'anjiang predicted runoff,                           |                                                 |                                                 |
| XAJ-IN-LSTM | 5 meteorological forcings,<br>15 static basin attribute | October 1,<br>1975, to<br>September 30,<br>1995 | October 1,<br>1995, to<br>September 30,<br>2015 |
| EXP-dPL     | 5 meteorological forcings,<br>15 static basin attribute |                                                 |                                                 |
| XAJ-dPL     | 5 meteorological forcings,<br>15 static basin attribute |                                                 |                                                 |

**Table S6** The data sources of indexes in Figure 13.

| Index       | Precipitation | Runoff                   | Evapotranspiration |
|-------------|---------------|--------------------------|--------------------|
| Observation | ERA5 /CN05.1  | VIC-CN05.1               |                    |
| LSTM        | ERA5 /CN05.1  | predicted by LSTM        |                    |
| EXP-IN-LSTM | ERA5 /CN05.1  | predicted by EXP-IN-LSTM | ERA5               |
| XAJ-IN-LSTM | ERA5 /CN05.1  | predicted by XAJ-IN-LSTM |                    |
| EXP-dPL     | ERA5 /CN05.1  | predicted by EXP-dPL     |                    |
| XAJ-dPL     | ERA5 /CN05.1  | predicted by XAJ-dPL     |                    |
| EXP-dPL-ET  | ERA5 /CN05.1  | predicted by EXP-dPL     | output by EXP-dPL  |
| XAJ-dPL-ET  | ERA5 /CN05.1  | predicted by XAJ-dPL     | output by XAJ-dPL  |

**Figure. S1.** Spatial distribution of outlets in 544 basins

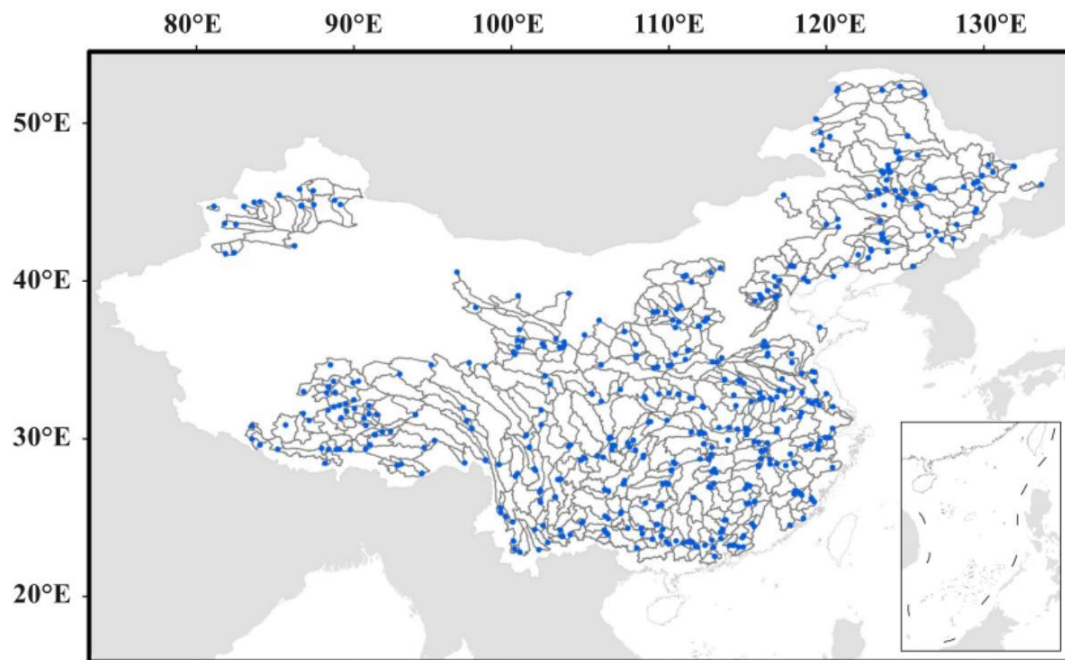

**Figure. S2** The time series of runoff over 15 gauged basins

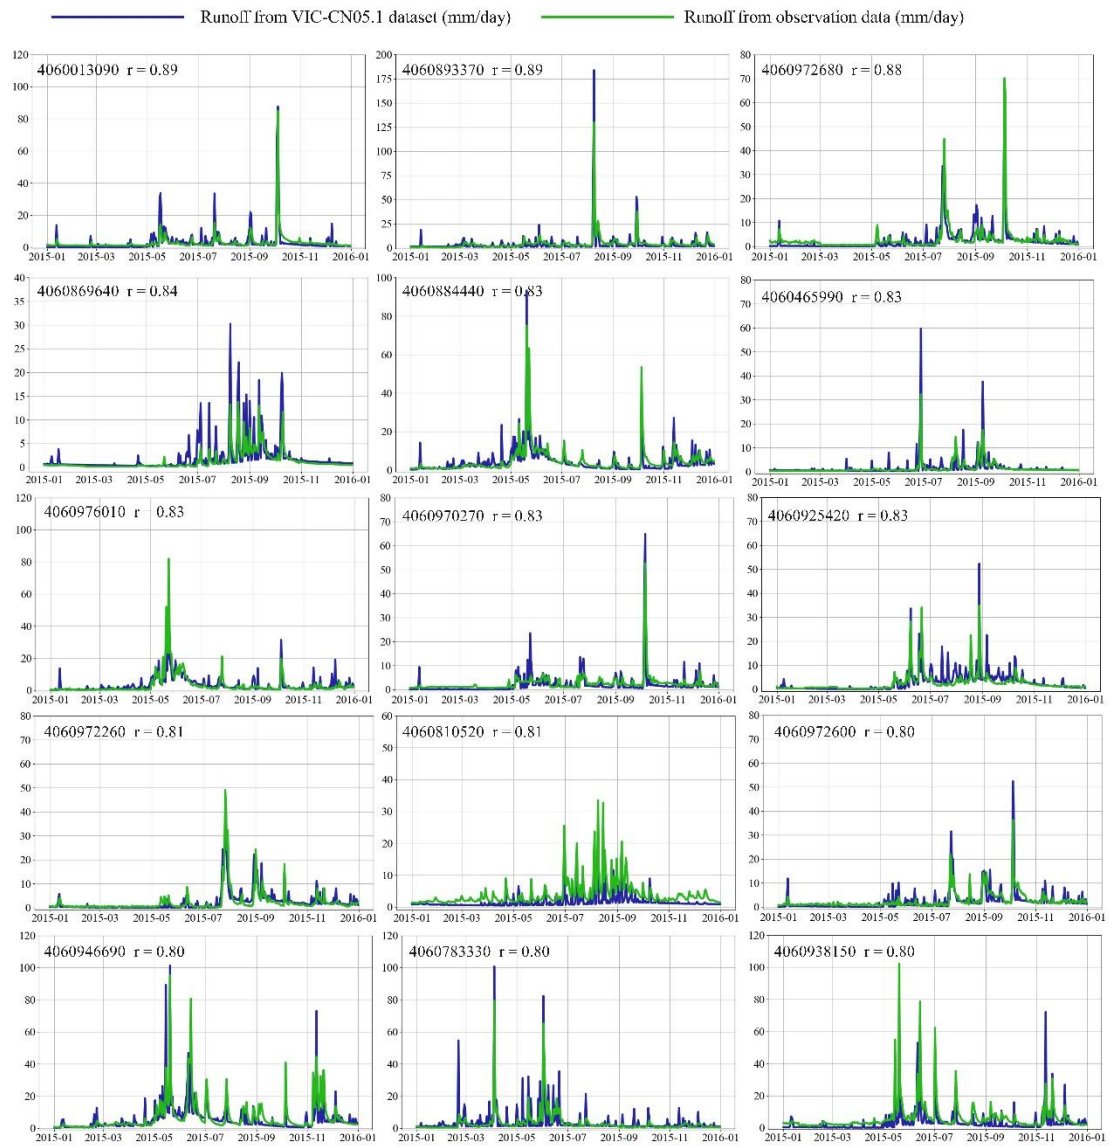

Supplement: Supplementary file 1 [file egusphere-2025-1161-supplement.pdf]
